# Supplementary material for: G2DC-PL+: a gridded 2 km daily climate dataset for the union of the Polish territory and the Vistula and Odra basins
Source: Copernicus journal article supplement (doi:10.5194/essd-13-1273-2021), 2021-03-24
Supplement: Supplementary file 1 [file essd-13-1273-2021-supplement.pdf]

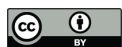

*Supplement of*

## **G2DC-PL+: a gridded 2 km daily climate dataset for the union of the Polish territory and the Vistula and Odra basins**

**Mikołaj Piniewski et al.**

*Correspondence to:* Mikołaj Piniewski ([mikolaj\\_piniewski@sggw.edu.pl](mailto:mikolaj_piniewski@sggw.edu.pl))

The copyright of individual parts of the supplement might differ from the article licence.

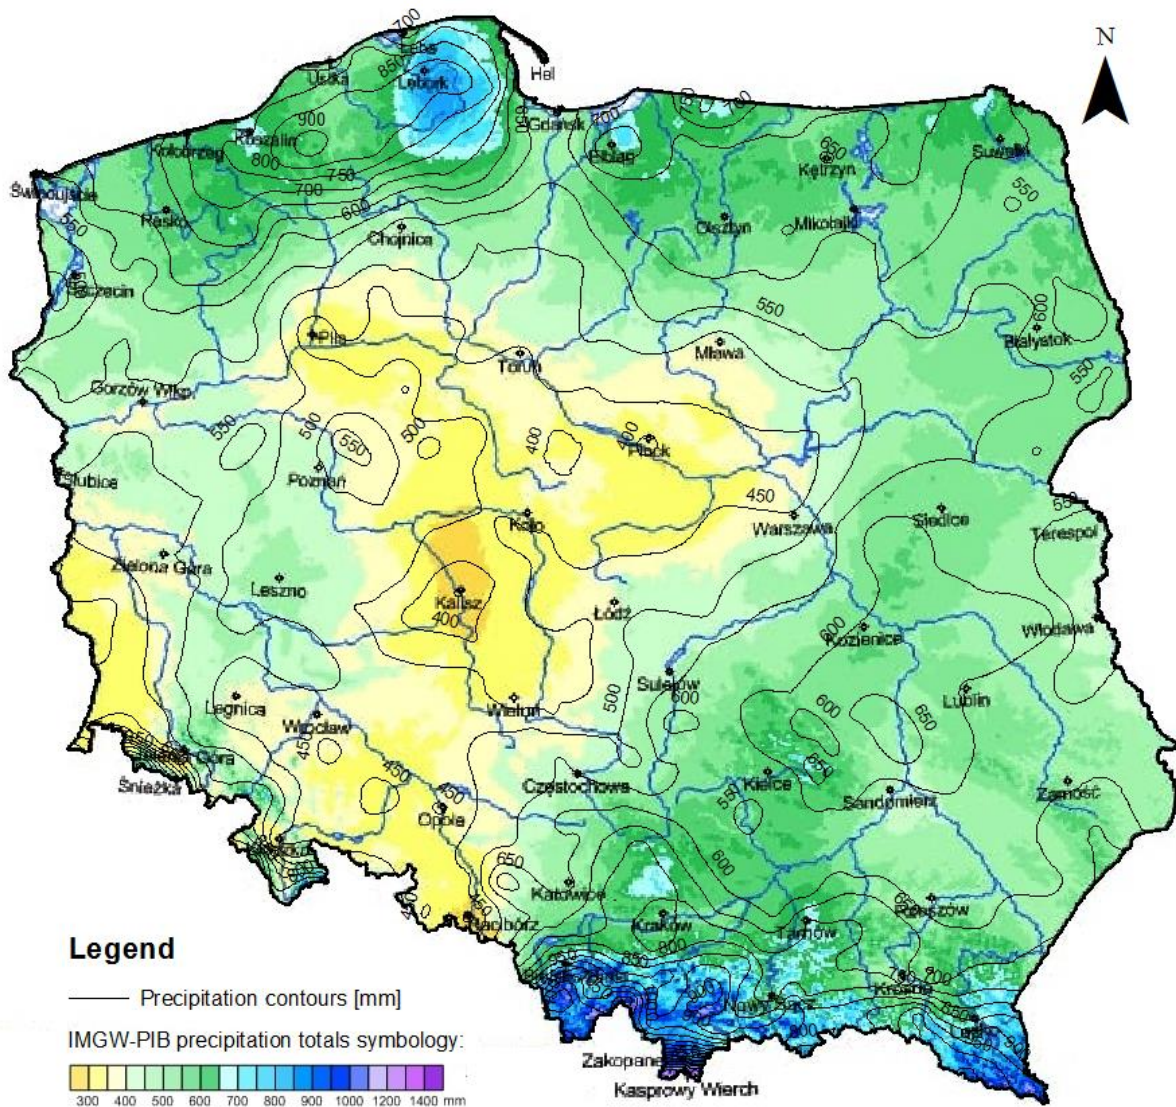

Figure S1. Comparison of the G2DC-PL+ mean annual precipitation contours with the IMGW-PIB mean annual precipitation map for 2015 (dry year). Contours are in 50 mm intervals. The IMGW-PIB map indicates also major rivers (blue lines) and major cities (labelled black circles). The IMGW-PIB map is adapted from the Climatic Maps of Poland<sup>1</sup>.

<sup>1</sup> <https://klimat.imgw.pl/pl>

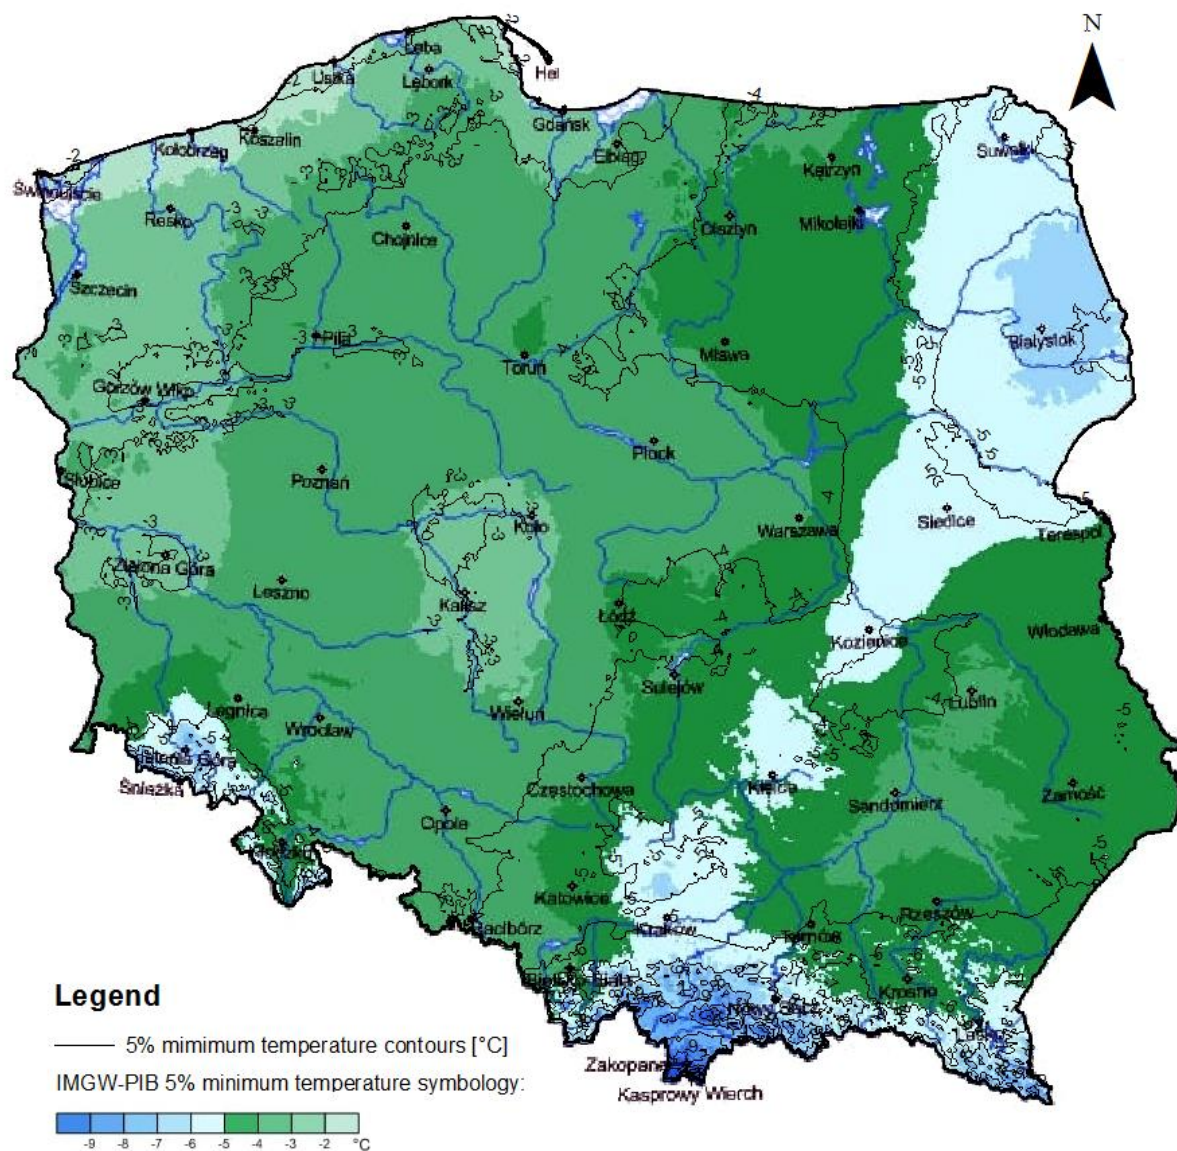

Figure S2. Comparison of the G2DC-PL+ 5<sup>th</sup> percentile minimum temperatures contours with the IMGW-PIB 5<sup>th</sup> percentile minimum temperatures map for 2015 (warm year). Contours are in 1 °C intervals. The IMGW-PIB map indicates also major rivers (blue lines) and major cities (labelled black circles). The IMGW-PIB map is adapted from the Climatic Maps of Poland.



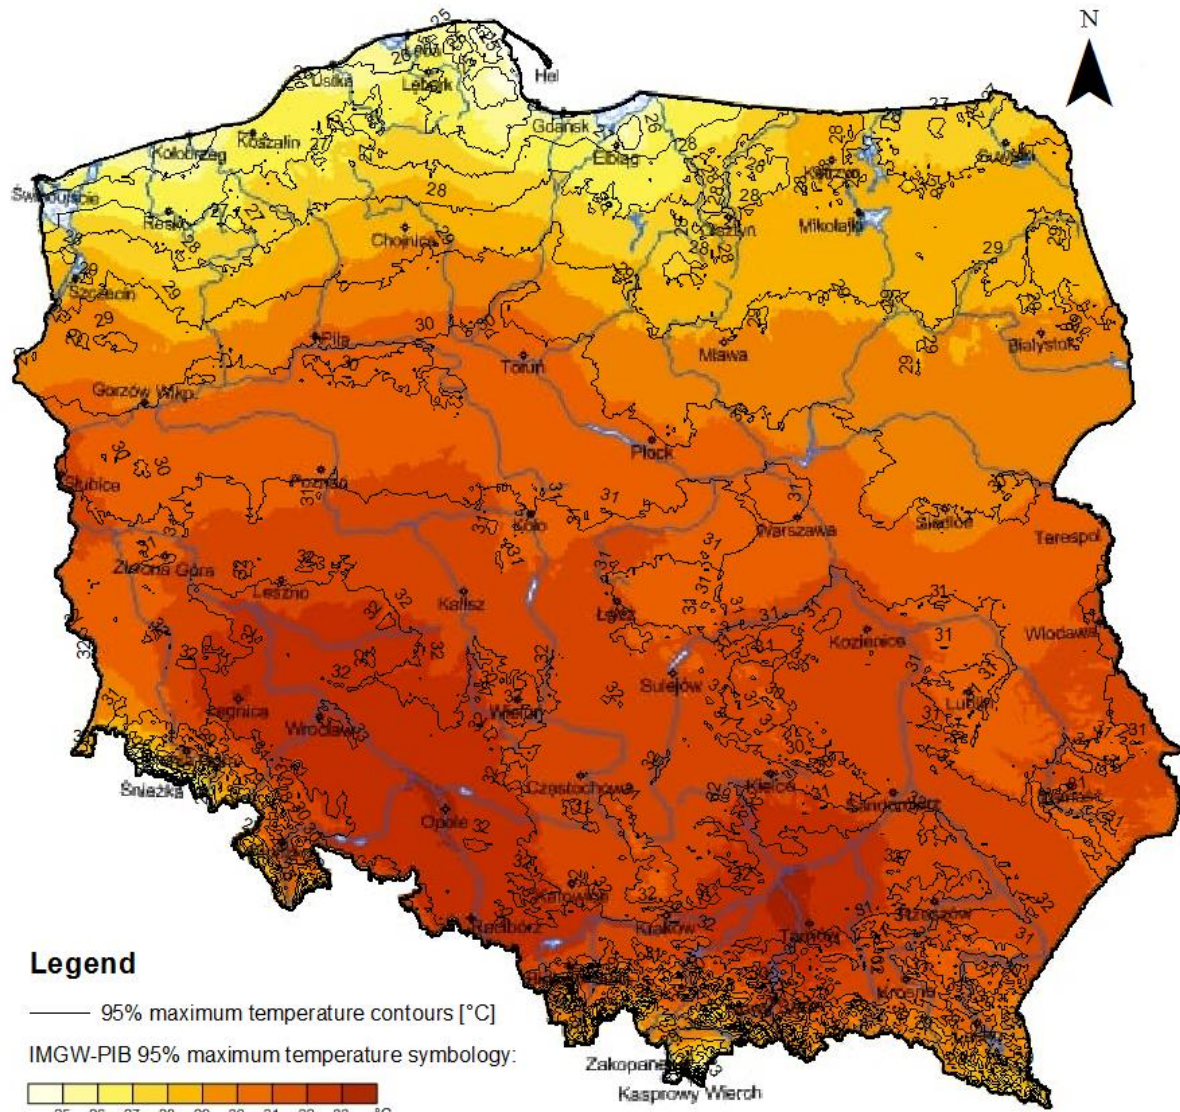

Figure S3. Comparison of the G2DC-PL+ 5<sup>th</sup> percentile maximum temperatures contours with the IMGW-PIB 5<sup>th</sup> percentile maximum temperatures map for 2015 (warm year). Contours are in 1 °C intervals. The IMGW-PIB map indicates also major rivers (blue lines) and major cities (labelled black circles). The IMGW-PIB map is adapted from the Climatic Maps of Poland.

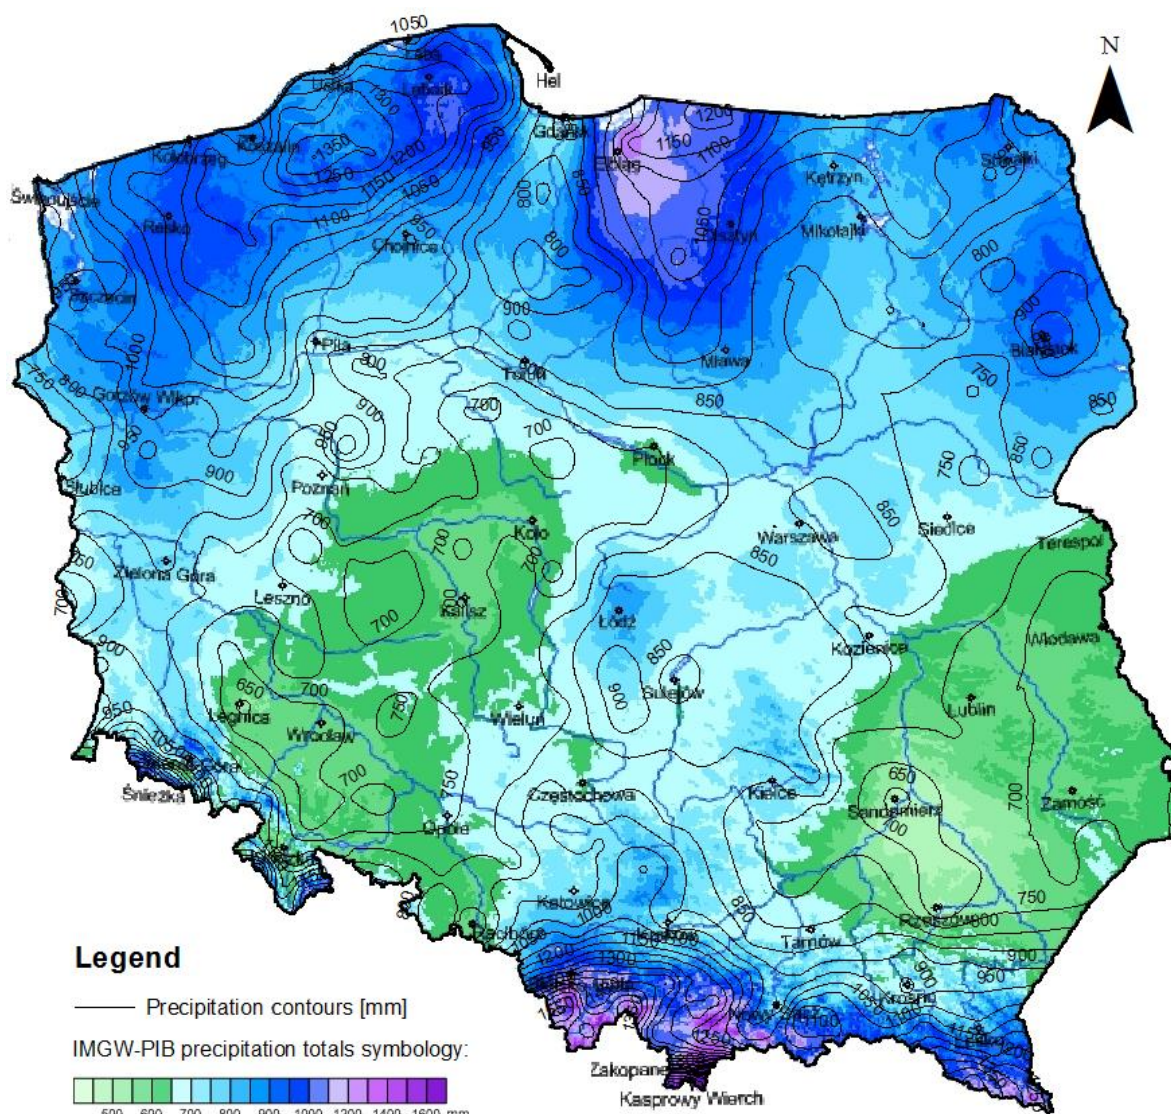

Figure S4. Comparison of the G2DC-PL+ mean annual precipitation contours with the IMGW-PIB mean annual precipitation map for 2017 (wet year). Contours are in 50 mm intervals. The IMGW-PIB map indicates also major rivers (blue lines) and major cities (labelled black circles). The IMGW-PIB map is adapted from the Climatic Maps of Poland.



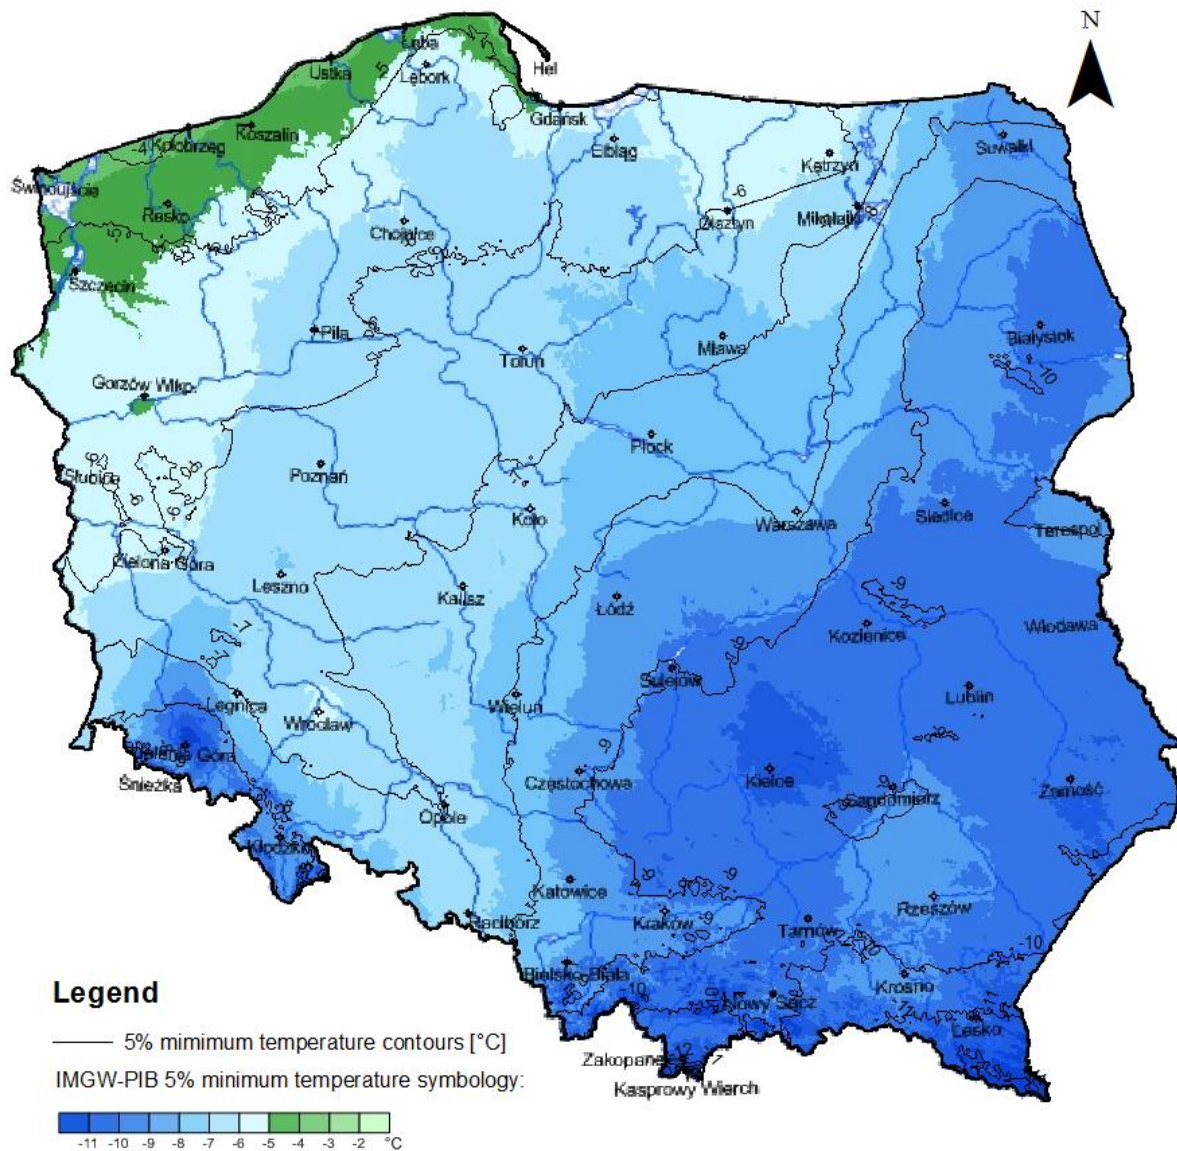

Figure S5. Comparison of the G2DC-PL+ 5<sup>th</sup> percentile minimum temperatures contours with the IMGW-PIB 5<sup>th</sup> percentile minimum temperatures map for 2017 (cool year). Contours are in 1 °C intervals. The IMGW-PIB map indicates also major rivers (blue lines) and major cities (labelled black circles). The IMGW-PIB map is adapted from the Climatic Maps of Poland.

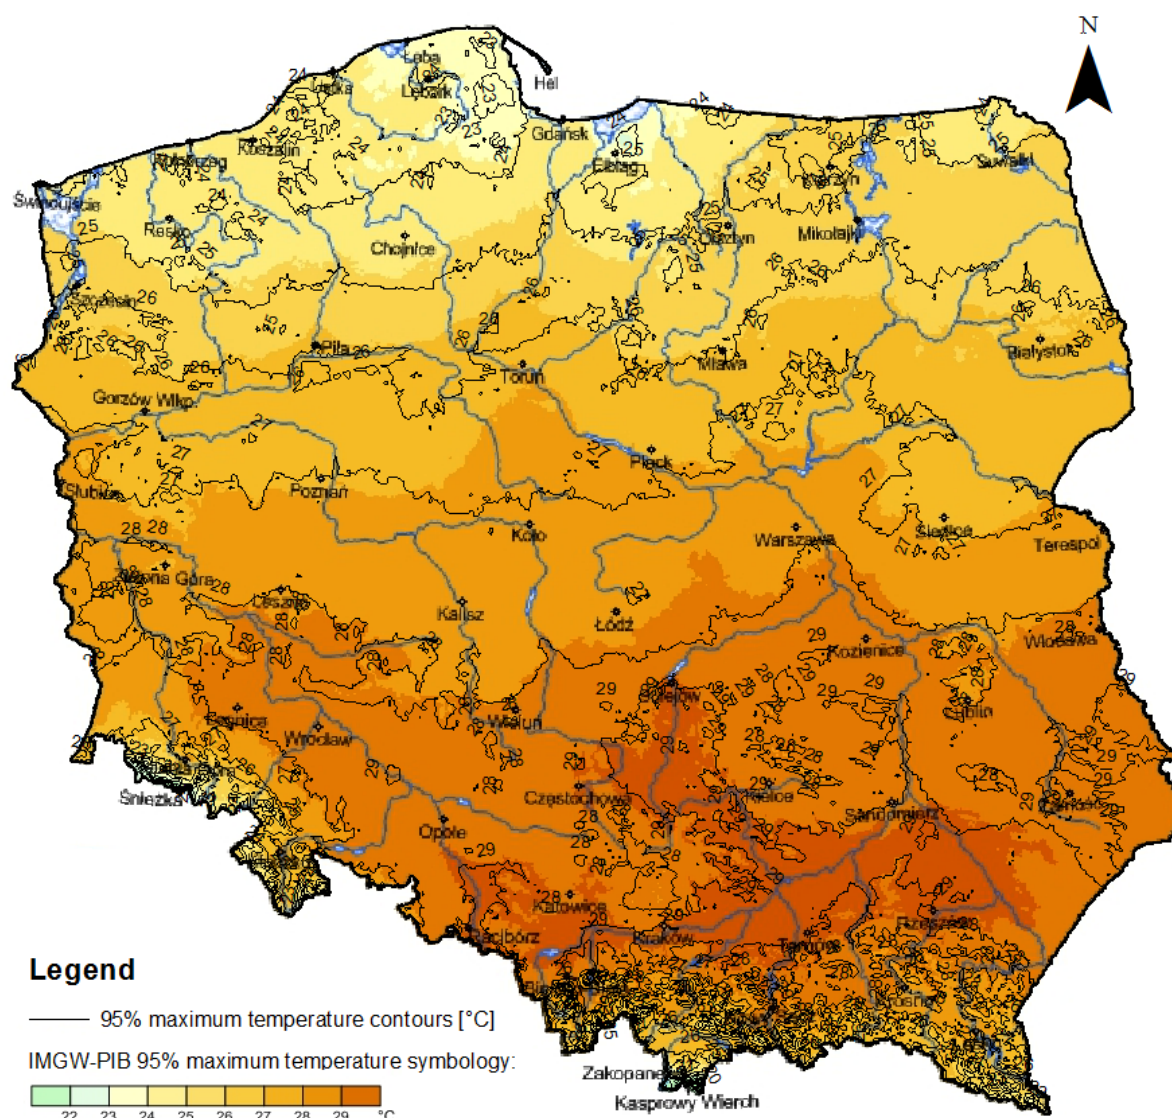

Figure S6. Comparison of the G2DC-PL+ 5<sup>th</sup> percentile maximum temperatures contours with the IMGW-PIB 5<sup>th</sup> percentile maximum temperatures map for 2017 (cool year). Contours are in 1 °C intervals. The IMGW-PIB map indicates also major rivers (blue lines) and major cities (labelled black circles). The IMGW-PIB map is adapted from the Climatic Maps of Poland.
